# Supplementary material
Source: Springer Nature journal article supplement (https://www.springermedizin.de/resource/supplementary/13256_2010_1535_MOESM2_ESM.pdf/9647886)

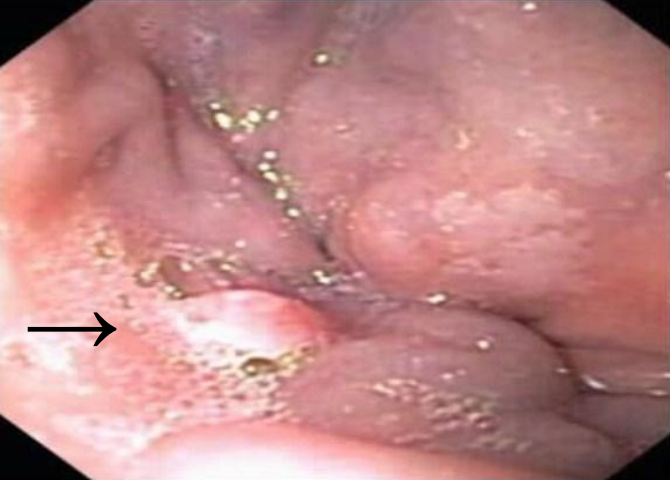

Supplement: MOESM2 [file 9647886]
